# Supplementary material
Source: MDPI journal article supplement (https://www.mdpi.com/2227-9717/10/5/986)
Supplement: s1 [file s1]

# Supplementary Material

## Exploring the Role of Droplet Initial Position in Coalescence-Induced Droplet Jumping: Lattice Boltzmann Simulations

Yuhao Zhu,<sup>1</sup> Xiao Yan,<sup>2</sup> Lei Ma,<sup>3, a)</sup> Zhichun Liu,<sup>1, b)</sup> Wei Liu<sup>1</sup>

<sup>1</sup>School of Energy and Power Engineering, Huazhong University of Science and Technology (HUST), Wuhan 430074, China

<sup>2</sup>Department of Mechanical Science and Engineering, University of Illinois at Urbana–Champaign, Urbana, IL 61801, USA

<sup>3</sup>Shenzhen Technology University Shenzhen Technol Univ, Coll New Mat & New Energies, Shenzhen 518118, China

<sup>a)</sup> Author to whom correspondence should be addressed: malei@sztu.edu.cn

<sup>b)</sup> Author to whom correspondence should be addressed: zcliu@hust.edu.cn

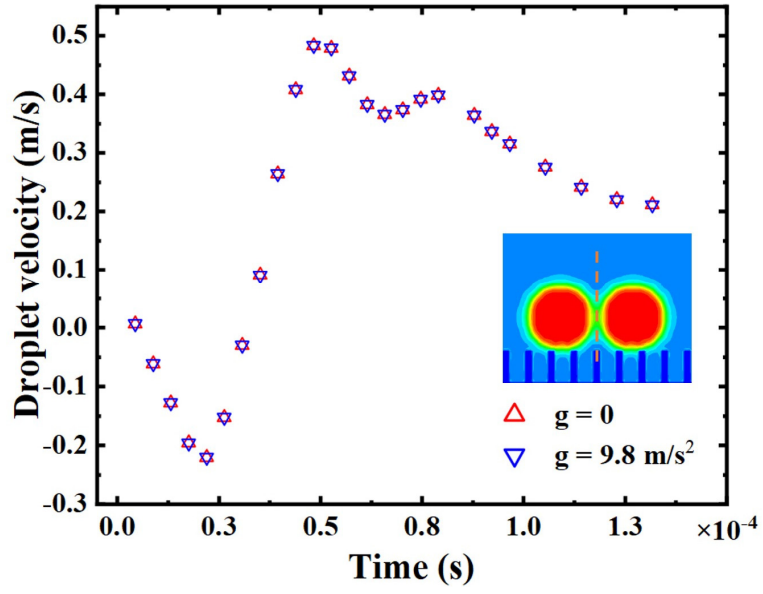

**Figure S1.** Simulation results of velocity-time evolution with and without gravity. The initial state of two droplets are shown in the picture with surface apparent contact angle  $\sim 150^\circ$ . Therefore, it is reasonable to ignore the effect of gravity.

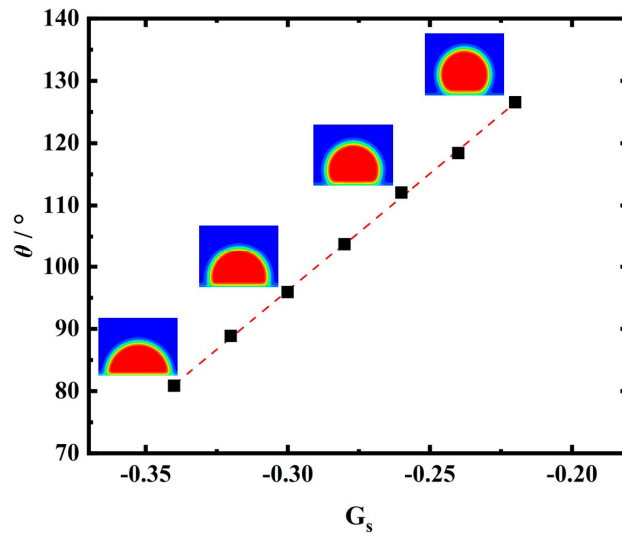

**Figure S2.** Simulation results of contact angles with different  $G_s$ , where  $G_s$  is the interaction strength between solid and fluid for controlling the wetting conditions (contact angles).

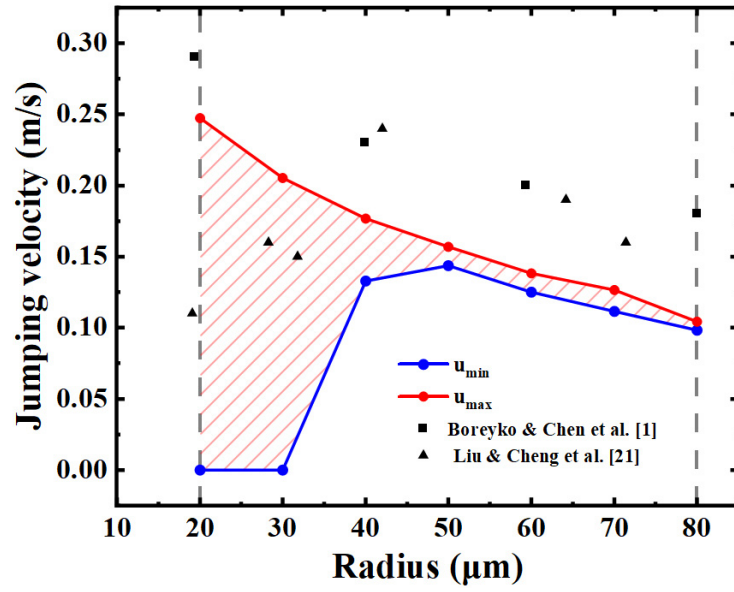

**Figure S3.** The comparison of simulated jumping velocities after droplet coalescence with experimental results.

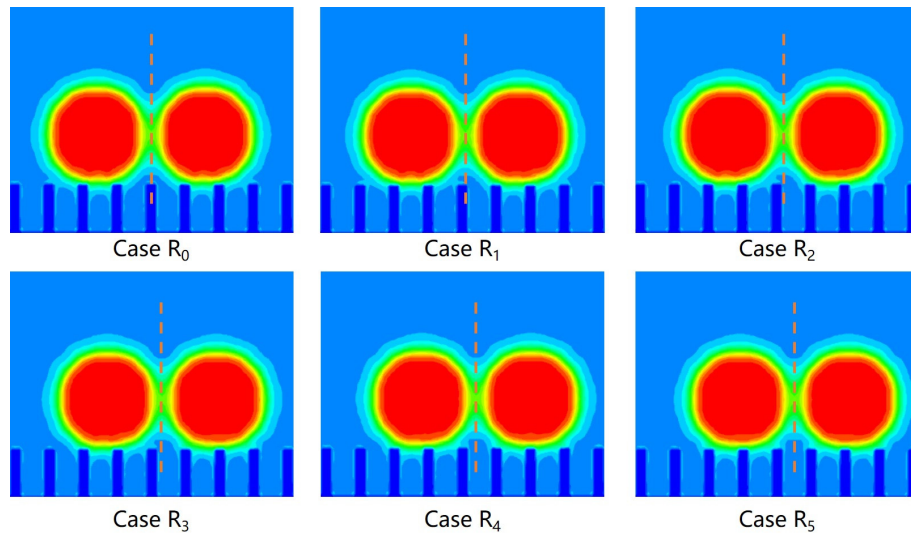

**Figure S4.** Different initial positions of Case  $R_j$  ( $j = 0 \sim 5$ ). The initial position of the droplet pair is indicated by the mutual tangent of two droplets (the dotted line).

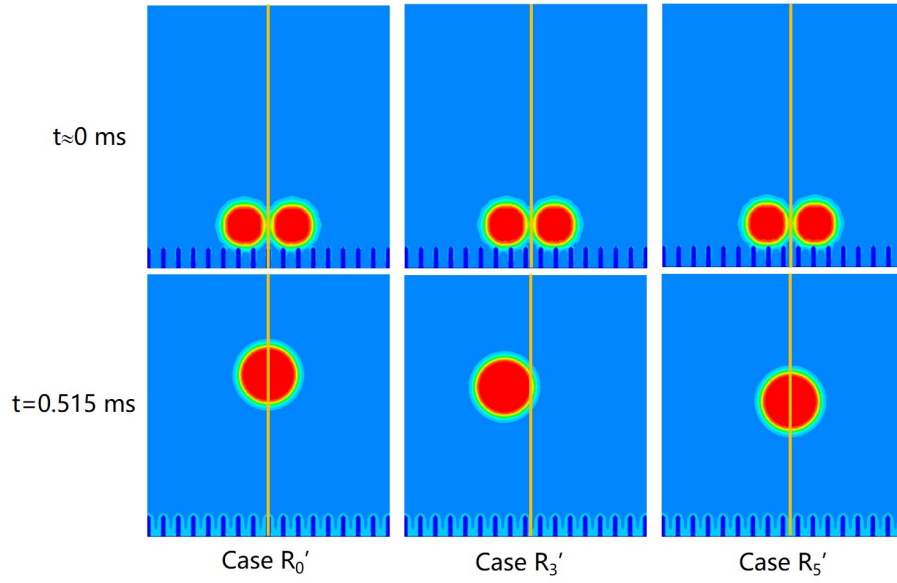

**Figure S5.** Simulation results of droplet coalescence on the refined surface where the initial position of Case  $R'_j$  ( $j=0, 1, 2, 3, 4, 5$ ) corresponds to Case  $R_j$ . The coalesced droplet of Case  $R'_5$  successfully jumps up from the new surface compared with Case  $R_5$ .

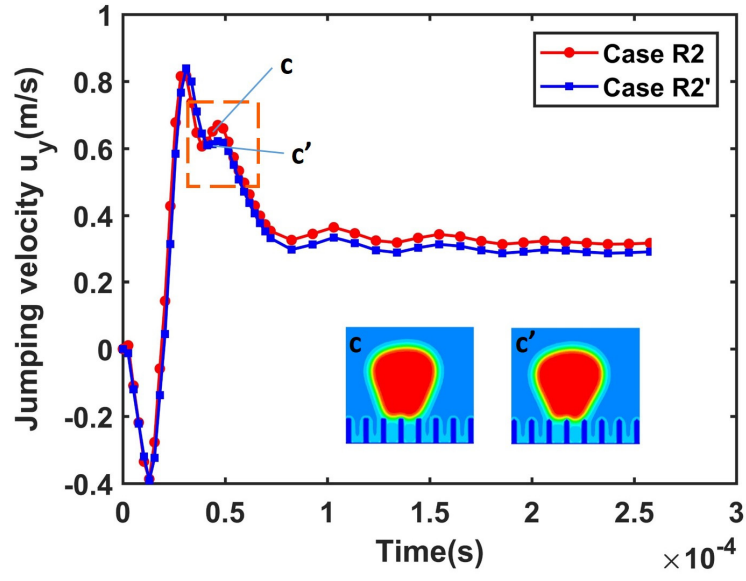

**Figure S6.** Comparison of droplet velocity-time evolution in Case R2 and Case R2'. The vertical velocity mainly varies during droplet deformation without detaching micropillars when only under the counteractive force from the pillars.
